# Supplementary material for: Structural and bonding properties of Cu3O3− and Cu3O4− clusters: anion photoelectron spectroscopy and density functional calculations
Source: Royal Society of Chemistry journal article supplement (doi:10.1039/c8cp03302a), 2018-01-01
Supplement: c8cp03302a1.pdf [file c8cp03302a1.pdf]

## *Supplementary Information*

### **Structural and bonding properties of $\text{Cu}_3\text{O}_3^-$ and $\text{Cu}_3\text{O}_4^-$ clusters: anion photoelectron spectroscopy and density functional calculations**

Xi-Ling Xu,<sup>1</sup> Bin Yang,<sup>1</sup> Zhi-You Wei,<sup>1</sup> Guo-Jin Cao,<sup>2</sup> Hong-Guang Xu,<sup>1</sup> Wei-Jun Zheng<sup>1,3\*</sup>

<sup>1</sup>*Beijing National Laboratory for Molecular Sciences (BNLMS), State Key Laboratory of Molecular Reaction Dynamics, Institute of Chemistry, Chinese Academy of Sciences, Beijing 100190, China*

<sup>2</sup>*Institute of Molecular Science, Shanxi University, Taiyuan 030006, China*

<sup>3</sup>*University of Chinese Academy of Sciences, Beijing 100049, China*

\* Corresponding author. E-mail: [zhengwj@iccas.ac.cn](mailto:zhengwj@iccas.ac.cn)

Tel: +86 10 62635054, Fax: +86 10 62563167

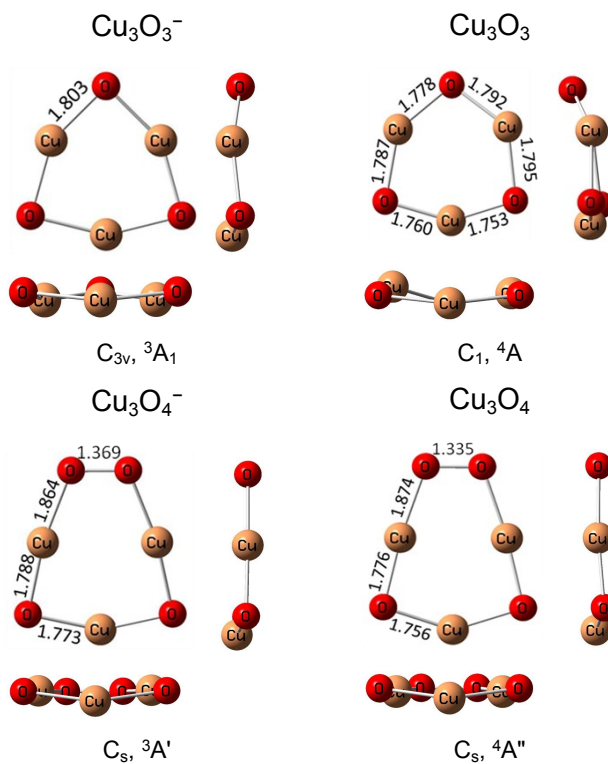

**Fig. S1** The most stable structures of  $\text{Cu}_3\text{O}_3^{-/0}$  and  $\text{Cu}_3\text{O}_4^{-/0}$  clusters viewed from different angles. The bond lengths are in angstroms.

**Table S1** The relative energies and vertical detachment energies (VDEs) of  $\text{Cu}_3\text{O}_3^-$  obtained from different functionals with the aug-cc-pVTZ/O/aug-cc-pVTZ-pp/Cu basis sets.

| $\text{Cu}_3\text{O}_3^-$ | $\Delta E(\text{eV})$ |      |       | VDE (eV) |      |       |       |
|---------------------------|-----------------------|------|-------|----------|------|-------|-------|
|                           | B3LYP                 | PBE0 | B3P86 | B3LYP    | PBE0 | B3P86 | Expt. |
| 3A                        | 0.00                  | 0.00 | 0.00  | 3.52     | 3.42 | 4.02  | 3.48  |
| 3B                        | 0.38                  | 0.32 | 0.35  | 3.15     | 3.67 | 4.24  |       |
| 3C                        | 0.82                  | 0.90 | 0.79  | 3.20     | 3.20 | 3.74  |       |

**Table S2** Cartesian coordinates for stable isomers of  $\text{Cu}_3\text{O}_3^-$  and  $\text{Cu}_3\text{O}_4^-$  clusters.

| $\text{Cu}_3\text{O}_3^-$ |             |             |             |    |            |             |             |
|---------------------------|-------------|-------------|-------------|----|------------|-------------|-------------|
|                           | <b>3A</b>   |             |             |    | <b>3B</b>  |             |             |
|                           | X           | Y           | Z           |    | X          | Y           | Z           |
| O                         | 1.73448700  | 1.00140700  | 0.14751500  | Cu | 0.00000000 | 0.00000000  | 1.46515500  |
| O                         | 0.00000000  | -2.00281300 | 0.14751500  | Cu | 0.00000000 | 1.15251100  | -0.72436800 |
| O                         | -1.73448700 | 1.00140700  | 0.14751500  | Cu | 0.00000000 | -1.15251100 | -0.72436800 |
| Cu                        | 0.00000000  | 1.45757800  | -0.04069400 | O  | 0.00000000 | 0.00000000  | -2.13378900 |
| Cu                        | -1.26230000 | -0.72878900 | -0.04069400 | O  | 0.00000000 | 1.72533700  | 1.03713400  |
| Cu                        | 1.26230000  | -0.72878900 | -0.04069400 | O  | 0.00000000 | -1.72533700 | 1.03713400  |
| <b>3C</b>                 |             |             |             |    |            |             |             |
| O                         | 0.00000000  | 0.00000000  | -2.19974700 |    |            |             |             |
| O                         | 0.00000000  | 1.66442300  | 0.93373200  |    |            |             |             |
| O                         | 0.00000000  | -1.66442300 | 0.93373200  |    |            |             |             |
| Cu                        | 0.00000000  | -1.10845400 | -0.75292700 |    |            |             |             |
| Cu                        | 0.00000000  | 0.00000000  | 1.59751900  |    |            |             |             |
| Cu                        | 0.00000000  | 1.10845400  | -0.75292700 |    |            |             |             |
| $\text{Cu}_3\text{O}_4^-$ |             |             |             |    |            |             |             |
|                           | <b>4A</b>   |             |             |    | <b>4B</b>  |             |             |
|                           | X           | Y           | Z           |    | X          | Y           | Z           |
| Cu                        | 0.06677700  | -0.53921400 | 1.33504900  | Cu | 0.00000000 | 0.00000000  | -3.45225100 |
| Cu                        | -0.18866100 | 1.67164000  | 0.00000000  | O  | 0.00000000 | 0.00000000  | -5.12159100 |
| Cu                        | 0.06677700  | -0.53921400 | -1.33504900 | O  | 0.00000000 | 0.00000000  | -1.75939300 |
| O                         | 0.03310300  | 1.21094700  | 1.69791500  | O  | 0.00000000 | 0.00000000  | 1.75939600  |
| O                         | 0.03310300  | 1.21094700  | -1.69791500 | O  | 0.00000000 | 0.00000000  | 5.12158900  |
| O                         | 0.06677700  | -2.28614200 | -0.68442100 | Cu | 0.00000000 | 0.00000000  | 3.45224800  |
| O                         | 0.06677700  | -2.28614200 | 0.68442100  | Cu | 0.00000000 | 0.00000000  | 0.00000200  |
| <b>4C</b>                 |             |             |             |    |            |             |             |
| O                         | -0.76526400 | 1.40289100  | 0.34156600  |    |            |             |             |
| O                         | -0.37415600 | -1.57546700 | 0.26780800  |    |            |             |             |
| O                         | 2.41916700  | 0.26701500  | -0.01874200 |    |            |             |             |
| Cu                        | 0.92501800  | 1.27626200  | -0.04537000 |    |            |             |             |
| Cu                        | 1.27180500  | -1.11801700 | -0.06394200 |    |            |             |             |
| Cu                        | -1.63345300 | -0.24609800 | 0.03400600  |    |            |             |             |
| O                         | -3.32196400 | 0.22402900  | -0.31764900 |    |            |             |             |
